# Supplementary material for: Molecular Systematics of Valerianella Mill. (Caprifoliaceae): Challenging the Taxonomic Value of Genetically Controlled Carpological Traits
Source: MDPI journal article supplement (doi:10.3390/plants11101276), 2022-05-10
Supplement: s1 [file s1]

## Supplementary Tables

**Table S1.** List of the *Valerianella*, *Fedia* and *Centranthus* taxa sampled in the Iberian Peninsula and the outgroups used in the plastid and nuclear AFLP studies. For each entry, the population codes used in AFLP analysis and the localities of origin are indicated. GenBank accession codes in bold correspond to new data generated in this study. Taxonomic classification of *Valerianella* follows Euro+Med (2006) and Devesa & López (2007). Herbaria acronyms: COFC (Córdoba University, Spain), K (Kew Royal Botanic Garden), UNEX (University of Extremadura, Spain), YU (University of Alabama, US).

| Species                                                                    | Locality and collections details                                                        | AFLP Code | GenBank accession <i>trn</i> TL | GenBank accession <i>trn</i> LF |
|----------------------------------------------------------------------------|-----------------------------------------------------------------------------------------|-----------|---------------------------------|---------------------------------|
| <i>Centranthus calcitrapae</i> (L.) Dufr.                                  | SPAIN, Cuenca, Montalbano, J. López & F. Bueno 5/06, UNEX 35366.                        |           | XXXXXX                          | XXXXXX                          |
|                                                                            | SPAIN, Salamanca Ituro de Azaba, J. López & E. López 39/05, UNEX 35343.                 |           | XXXXXX                          | XXXXXX                          |
| <i>Centranthus lecoqii</i> Jord.                                           | Amich et al. 354, YU.                                                                   |           |                                 | DQ354198                        |
| <i>Centranthus sieberi</i> Heldr.                                          | Maich 6083, YU.                                                                         |           |                                 | DQ354195                        |
| <i>Fedia cornucopiae</i> (L.) Gaertn. var. <i>cornucopiae</i> .            | SPAIN, Córdoba. Sierra Horconera.                                                       |           | XXXXXX                          | XXXXXX                          |
| <i>Fedia cornucopiae</i> var. <i>scorpioides</i> (Dufr.) J. López & Devesa | SPAIN, Badajoz, ctra. de Badajoz a Olivenza, J. López & F.J. Valtueña 3/05, UNEX 35316. |           | XXXXXX                          | XXXXXX                          |
| <i>Nardostachys jatamansi</i> (D. Don) DC.                                 | CHINA, Sichuan province, Boufford et al. 28099, A.                                      |           |                                 | AF447010                        |
| <i>Patrinia gibbosa</i> Maxim.                                             | SWITZERLAND, Cult. Zurich Bot. Gard., Switzerland. (A. Mast), 19885022.                 |           |                                 | AY792886                        |
| <i>Patrinia villosa</i> (Thunb.) Juss.                                     | SWITZERLAND, Cult. Zurich Bot. Gard., Switzerland. (A. Mast), 19910230.                 |           |                                 | AY792888                        |
| <i>Patrinia saniculifolia</i> Hemsl.                                       | SOUTH KOREA, Kangwon Prov, Chase 19250, K.                                              |           |                                 | JF269261                        |
| <i>Plectritis congesta</i> (Lindl.) DC.                                    | USA, Oregon, Benton Co. Shenk 308, YU.                                                  |           |                                 | AY792889                        |
| <i>Triplostegia glandulifera</i> Wall. ex DC.                              | CHINA, Sichuan Province, Boufford et al. 28440, A.                                      |           |                                 | MF737297                        |
| <i>Valeriana albonervata</i> B.L.Rob.                                      | MEXICO, Tamaulipas, Barrie & Nixon 1279 (YU).                                           |           |                                 | AY792893                        |
| <i>Valeriana celtica</i> L.                                                | SWITZERLAND, Valais. Bell, #SWITZ002 (YU).                                              |           |                                 | AY360121                        |

| Species                                                  | Locality and collections details                                                                                                                                | AFLP Code | GenBank accession<br><i>trnTL</i> | GenBank accession<br><i>trnLF</i> |
|----------------------------------------------------------|-----------------------------------------------------------------------------------------------------------------------------------------------------------------|-----------|-----------------------------------|-----------------------------------|
| <i>Valeriana dioica</i> L.                               | SWITZERLAND, Cult. Zurich Bot. Gard., #16910745 (YU).                                                                                                           |           |                                   | AY360119                          |
| <i>Valeriana edulis</i> Nutt. ex Torr. & A. Gray         | USA, Colorado, Park Co., Barrie #822 (YU).                                                                                                                      |           |                                   | AY360127                          |
| <i>Valeriana nivalis</i> Wedd.                           | Bolivia, La Paz. Eriksen & Molau, 4830 (YU)                                                                                                                     |           |                                   | AY792914                          |
| <i>Valerianella amarella</i> (Lindh. ex Engelm.) Krok    | USA, Texas, Brown, Both sides of main gravel road, 0.3 mi S of gate E of barracks area, Camp Bowie Training Site (TX National Guard), Carr 12722, TEX 00020356. |           |                                   | DQ354210                          |
| <i>Valerianella coronata</i> (L.) DC. f. <i>coronata</i> | SPAIN, Ciudad Real, Viso del Marqués, J. López 25/05, UNEX 35331.                                                                                               | VCO01     |                                   | XXXXXX                            |
|                                                          | SPAIN, Cuenca, Montalbanejo, J. López 26/05, UNEX 35332.                                                                                                        | VCO02     |                                   | XXXXXX                            |
|                                                          | SPAIN, Cuenca, Pinarejo, J. López & F. Bueno 6/06, UNEX 35295.                                                                                                  | VCO03     |                                   |                                   |
|                                                          | SPAIN, Madrid Arganda del Rey, J. López & F. Bueno 18/05, UNEX 35330.                                                                                           | VCO04     |                                   | XXXXXX                            |
|                                                          | SPAIN, Salamanca, El Bodón, J. López & E. López 38/05, UNEX 35342.                                                                                              | VCO05     |                                   | XXXXXX                            |
|                                                          | SPAIN, Segovia, Torrecilla del Pinar, J. López 34/05, UNEX 35337.                                                                                               | VCO06     |                                   |                                   |
|                                                          | SPAIN, Huesca, Bentué, J. López 46/05, UNEX 35347.                                                                                                              | VCO07     |                                   | XXXXXX                            |
|                                                          | SPAIN, Cuenca, Montalbanejo, J. López & F. Bueno 4/06, UNEX 35363.                                                                                              | VCO08     |                                   |                                   |
|                                                          | SPAIN, Huesca, entre San Esteban de Litera y Aznauy, J. López & F. Bueno 13P/07, UNEX 35359.                                                                    | VCO09     |                                   |                                   |
|                                                          | USA, Cult. Yale Univ., Bell 105, YU.                                                                                                                            |           |                                   | AY792941                          |

| Species                                                                              | Locality and collections details                                                               | AFLP Code | GenBank accession <i>trn</i> TL | GenBank accession <i>trn</i> LF |
|--------------------------------------------------------------------------------------|------------------------------------------------------------------------------------------------|-----------|---------------------------------|---------------------------------|
| <i>Valerianella coronata</i> f. <i>pumila</i> (L.) Devesa, J. López & R. Gonzalo     | SPAIN, Cuenca, Montalbano, J. López & F. Bueno 3/06, UNEX 35362.                               | VPU01     |                                 | XXXXXX                          |
|                                                                                      | SPAIN, Huesca, San Esteban de Litera y Aznauy, J. López & F. Bueno 14P/07, UNEX 35358.         | VPU02     |                                 |                                 |
|                                                                                      | SPAIN, Zaragoza, Osera de Ebro, J. López & F. Bueno 10P/07, UNEX 35298.                        | VPU03     |                                 | XXXXXX                          |
|                                                                                      | SPAIN, Huesca, San Esteban de Litera, J. López & F. Bueno 12P/07, UNEX 35297.                  | VPU04     |                                 | XXXXXX                          |
|                                                                                      | USA, Cult. Yale Univ., Bell 108, YU.                                                           |           |                                 | AY792945                        |
| <i>Valerianella dentata</i> (L.) Pollich f. <i>dentata</i>                           | SPAIN, Burgos, Oña, J. López 60/05, UNEX 35369.                                                | VDE01     |                                 |                                 |
|                                                                                      | SPAIN, Huesca, Yebra de Basa, J. López 44/05, UNEX 35759.                                      | VDE02     |                                 |                                 |
|                                                                                      | SPAIN, Huesca, Jaca, San Juan de la Peña, J. López 43/05, UNEX 35346.                          | VDE03     |                                 | XXXXXX                          |
|                                                                                      | SPAIN, Huesca, San Juan de Plan, pista a San Mamés, J. López 20/07, UNEX 35655.                | VDE04     |                                 |                                 |
|                                                                                      | SPAIN, Huesca, Puerto de Bonansa, J. López 22/07, UNEX 35653.                                  | VDE05     |                                 |                                 |
| <i>Valerianella dentata</i> f. <i>rimosa</i> (Bastard) Devesa, J. López & R. Gonzalo | SPAIN, Huesca, San Juan de Plan. Pista a San Mamés, J. López 21/07, UNEX 35652.                | VRI01     |                                 | XXXXXX                          |
|                                                                                      | SPAIN, Huesca Puerto de Bonansa, J. López 23/07, UNEX 35654.                                   | VRI02     |                                 | XXXXXX                          |
| <i>Valerianella discoidea</i> (L.) Loisel                                            | SPAIN, Badajoz, San Jorge de Alor, A. Ortega-Olivencia & J. López 4/05, UNEX 35327.            | VDI01     |                                 |                                 |
|                                                                                      | SPAIN, Badajoz, San Isidro, A. Ortega-Olivencia & J. López 1/05, UNEX 35315.                   | VDI02     |                                 | XXXXXX                          |
|                                                                                      | SPAIN, Córdoba, entre Villafranca de Córdoba y Aldamuz, J. López & F. Bueno, 1/06, UNEX 35361. | VDI03     |                                 |                                 |

| Species                                                                          | Locality and collections details                                                 | AFLP Code | GenBank accession <i>trn</i> TL | GenBank accession <i>trn</i> LF |
|----------------------------------------------------------------------------------|----------------------------------------------------------------------------------|-----------|---------------------------------|---------------------------------|
|                                                                                  | SPAIN, Cuenca, Pinarejo, J. López & F. Bueno 7/06, UNEX 35296.                   | VDI04     |                                 | XXXXXX                          |
|                                                                                  | SPAIN, Cuenca, proximidades a El Cubillo, J. López & F. Bueno 10/06, UNEX 35364. | VDI05     |                                 |                                 |
|                                                                                  | SPAIN, Huelva, Galaroza, A. Ortega-Olivencia & J. López 7/05, UNEX 35349.        | VDI06     |                                 |                                 |
|                                                                                  | SPAIN, Madrid, Arganda del Rey, J. López & F. Bueno 16/05, UNEX 35352.           | VDI07     |                                 |                                 |
|                                                                                  | SPAIN, Segovia, Coca, río Eresma, J. López 32/05, UNEX 35309.                    | VDI08     |                                 |                                 |
| <i>Valerianella echinata</i> (L.) DC.                                            | SPAIN, Guadalajara, Muduex, vaguada, J. López & F. Bueno 8P/07, UNEX 35357.      | VEC01     |                                 | XXXXXX                          |
| <i>Valerianella eriocarpa</i> Desv.                                              | SPAIN, Badajoz, San Isidro, J. López & E. López 2/05, UNEX 35313.                | VER01     |                                 |                                 |
|                                                                                  | SPAIN, Badajoz, La Haba, J. López & F. Bueno 11/05, UNEX 35350.                  | VER02     |                                 | XXXXXX                          |
|                                                                                  | SPAIN, Madrid, Arganda del Rey, J. López & F. Bueno 15/05, UNEX 35351.           | VER03     |                                 |                                 |
|                                                                                  | SPAIN, Segovia, Coca. Río Eresma, J. López 33/05, UNEX 35310.                    | VER04     |                                 | XXXXXX                          |
|                                                                                  | USA, Cult. Yale Univ., Bell 107, YU.                                             |           |                                 | AY792943                        |
| <i>Valerianella florifera</i> Shinnars                                           | USA, Texas, Fayette, Carr 12663, TEX 00350835.                                   |           |                                 | DQ354211                        |
| <i>Valerianella fusiformis</i> Pau                                               | SPAIN, Burgos, Oña, J. López 59/05, UNEX 35370.                                  |           |                                 | XXXXXX                          |
| <i>Valerianella locusta</i> (L.) Laterr. subsp. <i>locusta</i> f. <i>locusta</i> | SPAIN, Segovia, de Carbonero a Bernardo, J. López 28/05, UNEX 35333.             | VLO01     |                                 | XXXXXX                          |
|                                                                                  | SPAIN, Huelva, Galaroza, A. Ortega-Olivencia & J. López 8/05, UNEX 35325.        | VLO02     |                                 |                                 |
|                                                                                  | SPAIN, Madrid, Guadalix de la Sierra, J.                                         | VLO03     |                                 | XXXXXX                          |

| Species                                                                                                     | Locality and collections details                                                         | AFLP Code | GenBank accession <i>trn</i> TL | GenBank accession <i>trn</i> LF |
|-------------------------------------------------------------------------------------------------------------|------------------------------------------------------------------------------------------|-----------|---------------------------------|---------------------------------|
|                                                                                                             | López & F. Bueno 12/05, UNEX 35328.                                                      |           |                                 |                                 |
|                                                                                                             | SPAIN, Madrid, cruce al Valle de los Caídos, J. López & F. Bueno 20/05, UNEX 35318.      | VLO04     |                                 | XXXXXX                          |
|                                                                                                             | SPAIN, Salamanca, Retortillo, J. López & E. López 37/05, UNEX 35340.                     | VLO05     |                                 | XXXXXX                          |
|                                                                                                             | SPAIN, Segovia, Coca, río Eresma, izda. puente, J. López 30/05, UNEX 35320.              | VLO06     |                                 | XXXXXX                          |
|                                                                                                             | Amich et al. 324, YU.                                                                    |           |                                 | DQ354201                        |
| <i>Valerianella locusta</i> subsp. <i>locusta</i> f. <i>carinata</i> (Loisel) Devesa, J. López & R. Gonzalo | SPAIN, Badajoz, Fregenal de la Sierra, A. Ortega-Olivencia & J. López 10/05, UNEX 35326. | VCA01     |                                 | XXXXXX                          |
|                                                                                                             | SPAIN, Ciudad Real, Calzada de Calatrava, J. López 21/05, UNEX 35322.                    | VCA02     |                                 | XXXXXX                          |
|                                                                                                             | SPAIN, Ciudad Real, El Viso del Marqués, J. López 24/05, UNEX 35324.                     | VCA03     |                                 | XXXXXX                          |
|                                                                                                             | SPAIN, Huelva, río Odiel, A. Ortega-Olivencia & J. López 5/05, UNEX 35311.               | VCA04     |                                 | XXXXXX                          |
|                                                                                                             | SPAIN, Segovia, Coca, río Eresma, drcha. puente, J. López 29/05, UNEX 35334.             | VCA05     |                                 | XXXXXX                          |
|                                                                                                             | SPAIN, Madrid, Miraflores de la Sierra, J. López & F. Bueno 14/05, UNEX 35321.           | VCA07     |                                 |                                 |
|                                                                                                             | SPAIN, Vitoria, Ibarra, J. López 61/05, UNEX 35368.                                      | VCA08     |                                 | XXXXXX                          |
|                                                                                                             | SPAIN, Madrid, Guadalix de la Sierra, J. López & F. Bueno 13/05, UNEX 35656.             | VCA09     |                                 | XXXXXX                          |
|                                                                                                             | SPAIN, Segovia, Coca, río Eresma, izda. puente, J. López 31/05, UNEX 35336.              | VCA10     |                                 | XXXXXX                          |
|                                                                                                             | SPAIN, Salamanca, Retortillo, J. López & E. López 36/05, UNEX 35339.                     | VCA11     |                                 | XXXXXX                          |

| Species                                                                                                       | Locality and collections details                                                         | AFLP Code | GenBank accession <i>trn</i> TL | GenBank accession <i>trn</i> LF |
|---------------------------------------------------------------------------------------------------------------|------------------------------------------------------------------------------------------|-----------|---------------------------------|---------------------------------|
|                                                                                                               | SPAIN, Madrid, cruce al Valle de los Caídos, J. López & F. Bueno 19/05, UNEX 35319.      | VCA12     |                                 | XXXXXX                          |
| <i>Valerianella locusta</i> subsp. <i>lusitanica</i> (Pau ex Font Quer) M. Láinz                              | SPAIN, Burgos, Pineda de la Sierra, J. López & F. Bueno 24/06, UNEX 35302.               | VLU01     |                                 | XXXXXX                          |
| <i>Valerianella microcarpa</i> Loisel                                                                         | SPAIN, Cáceres, Ctra. Deleitosa-Solana, T. Rodríguez-Riaño & J. López 2P/07, UNEX 35355. | VMI01     |                                 | XXXXXX                          |
|                                                                                                               | Bell s.n., YU.                                                                           |           |                                 | DQ354203                        |
| <i>Valerianella multidentata</i> Loscos & J. Pardo var. <i>oscensis</i> (Fanlo) Devesa, J. López & R. Gonzalo | SPAIN, Guadalajara, Muduex, vaguada, J. López & F. Bueno 6/07, UNEX 35306.               | VMU02     |                                 |                                 |
|                                                                                                               | SPAIN, Zaragoza, Osca de Ebro, J. López & F. Bueno 9P/07(2), UNEX 35649.                 | VMU03     |                                 |                                 |
| <i>Valerianella radiata</i> (L.) Dufr.                                                                        | USA, Texas, Bosque, W side of lake, Carr 9672, TEX 00020418.                             |           |                                 | DQ354209                        |
